1 **Medroxyprogesterone reverses tolerable dose metformin-**  
2 **induced inhibition of invasion via matrix metalloproteinase-**  
3 **9 and transforming growth factor- $\beta$ 1 in KLE endometrial**  
4 **cancer cells**

5

6 Dong Hoon Suh<sup>1</sup>, Sunray Lee<sup>2</sup>, Hyun-Sook Park<sup>2</sup>, Noh Hyun Park<sup>3,\*</sup>

7

8 <sup>1</sup>Department of Obstetrics and Gynecology, Seoul National University Bundang Hospital,  
9 Seongnam, Korea

10 <sup>2</sup>Cell Engineering for Origin Research Center, Seoul, Korea

11 <sup>3</sup>Department of Obstetrics and Gynecology, Seoul National University College of Medicine,  
12 Seoul, Korea

13

14

15 **\*Corresponding author:** Noh Hyun Park

16 Email: [pnhkhr@snu.ac.kr](mailto:pnhkhr@snu.ac.kr)

## 17 **Abstract**

18 This study was performed to evaluate the anticancer effects of tolerable doses of metformin  
19 with or without medroxyprogesterone (MPA) in endometrial cancer cells. Cell viability, cell  
20 invasion, and levels of matrix metalloproteinase (MMP) and transforming growth factor (TGF)-  
21  $\beta$ 1 were analyzed using three human endometrial adenocarcinoma cell lines (Ishikawa, KLE,  
22 and USPC) after treatment with different dose combinations of MPA (0, 10  $\mu$ M) and metformin  
23 (0, 100, 1000  $\mu$ M). Combining metformin (0, 100, 1000  $\mu$ M) and 10  $\mu$ M MPA induced  
24 significantly decreased cell viability in a time- and dose-dependent manner in Ishikawa cells,  
25 but not in KLE and USPC cells. There was no dose- or time-dependent cell growth inhibition,  
26 or positive western blot results for the expression of progesterone receptors and phospho-  
27 AMPK $\alpha$ , following treatment with any combination of metformin (0, 100, 1000  $\mu$ M) and 10  
28  $\mu$ M MPA in KLE and USPC cells. In KLE cells, metformin treatment alone significantly  
29 inhibited cell invasion in a dose-dependent manner (1.31 $\pm$ 0.05, 0.94 $\pm$ 0.04, 0.83 $\pm$ 0.05 at 0, 100  
30  $\mu$ M, 1000  $\mu$ M, respectively;  $p$ <0.0005). The inhibitory effect of metformin was reversed to  
31 create a stimulating effect when metformin was combined with 10  $\mu$ M MPA (1.10 $\pm$ 0.05,  
32 1.42 $\pm$ 0.18, 1.41 $\pm$ 0.26 at 0, 100, 1000  $\mu$ M, respectively;  $p$ <0.005). MMP-9 and TGF- $\beta$ 1 showed  
33 similar trends in terms of cell invasion in KLE cells. In conclusion, the anti-invasive effect of  
34 metformin in KLE cells was completely reversed to the state of no treatment by the addition of  
35 MPA; this might be mediated through MMP-9 and TGF- $\beta$ 1. Our study suggests the possibility  
36 of these combinations doing harm, rather than good, under some conditions.

## 37 **Introduction**

38           Uterine corpus cancer was found to be the 4th most common cancer in women in 2018;  
39 the estimated number of new cases was 63,230, accounting for 7% of all new cancer diagnoses  
40 in women (1). Endometrial cancer constitutes the majority of uterine cancers, excluding  
41 uncommon subtypes of stromal or mesenchymal sarcomas, which account for approximately  
42 3% of all uterine cancers. Despite multimodal treatment approaches, type I poorly  
43 differentiated endometrioid adenocarcinoma and type II cancers, including uterine serous  
44 papillary cancer (USPC) without estrogen receptor (ER) and progesterone receptor (PR)  
45 expression, have very poor prognosis unlike type I well-differentiated endometrioid  
46 adenocarcinoma, which expresses ER and PR. Among the systemic hormonal therapies  
47 considered for recurrent, metastatic, or high-risk disease, progestin is the most commonly used,  
48 mainly in the form of medroxyprogesterone acetate (MPA). However, clinical guidelines  
49 recommend that MPA may only be used for lower-grade endometrioid histology. This is based  
50 on previous reports that the highest response rates were noted in low-grade, ER-positive tumors  
51 of up to 55% (2, 3). In addition, long-term continuous use of progestin was known to cause a  
52 loss of effect of PR activation (2). Therefore, development of a new treatment strategy for  
53 groups of cancer with poorer prognosis is urgent.

54           Recently, metformin, an oral biguanide anti-diabetic drug for type 2 diabetes, was  
55 shown to have significant anticancer activity and considered a novel treatment option through  
56 drug repositioning (4), including for endometrial cancer (5-7). However, it should be noted that  
57 almost all previous studies were conducted with supra-pharmacological concentrations (doses)  
58 of metformin, that is, 10–100 times higher than maximally achievable therapeutic  
59 concentrations found in patients with type 2 diabetes mellitus (8). Such levels exceed the

60 maximum dose that could cause lactic acidosis, one of the most serious side effects of  
61 metformin. Any anticancer effect of metformin should be studied only in the condition of  
62 achievable therapeutic concentrations (8, 9).

63 Another approach for the development of novel anticancer drug regimens is the use of  
64 drug combinations. Although hormonal therapy is currently recommended only for lower-  
65 grade endometrioid histology in clinical guidelines, there is evidence suggesting several  
66 anticancer mechanisms of progestational agents, which could show significant effects in  
67 poorly-differentiated endometrioid adenocarcinoma, as well as USPC (2, 10, 11), particularly  
68 when combined with metformin (12).

69 The purpose of this study was to evaluate the anticancer effect of tolerable doses of  
70 metformin alone or with MPA in endometrial cancer cells.

71

## 72 **Materials and Methods**

### 73 **Cell Cultures**

74 Three human endometrial adenocarcinoma cell lines were used: Ishikawa (type I  
75 well-differentiated, ER+/PR+), KLE (type I poorly differentiated, ER-/PR-), and USPC (type  
76 II serous papillary carcinoma, ER-/PR-) (13). Ishikawa cells were purchased from the  
77 Japanese Collection of Research Bioresources cell bank and maintained in Dulbecco's  
78 Modified Eagle Medium (DMEM) (Life Technologies) containing 10% fetal bovine serum  
79 (FBS) (Hyclone, Logan), 50 µg/ml streptomycin, and 50 U/ml penicillin. KLE and USPC  
80 cells were obtained from the American Type Culture Collection (ATCC, USA). KLE was  
81 cultured in DMEM/F12 medium (Life Technologies, CA, USA) with 10% FBS and 0.5% P/S

82 and USPC cells were cultured in RPMI1640 medium (Life Technologies, CA, USA) with  
83 10% FBS, 2 mM/L glutamine, and 0.5% P/S. All the cells were cultured in an incubator at  
84 37°C under a humidified atmosphere containing 5% CO<sub>2</sub>.

85

## 86 **Dose setup of metformin treatments**

87 Tolerable doses of metformin (500 mg twice/day) could achieve a plasma  
88 concentration of around 1 mg/L (14). Although the maximal approved total daily dose of  
89 metformin for treatment of diabetes mellitus is 2.5 g (35 mg/kg body weight)(8), slow but  
90 progressive increase of fasting lactic acid levels during metformin treatment with multiple  
91 doses from 100 to 850 mg twice a day suggested that; the higher dose of metformin, the higher  
92 risk of lactic acidosis (14). Therapeutic plasma concentrations or ranges of metformin  
93 measured in previous studies of type 2 diabetes ranged from 0.129 to 90 mg/L (9). Therefore,  
94 1 mM (129.2 mg/L) was set as a maximal concentration of metformin for our experiment,  
95 enabling the maximum achievable plasma concentration in a clinical setting without the risk of  
96 lactic acidosis.

97

## 98 **Cell counting and cell survival analysis**

99 To increase cell growth rate, all cells were seeded in 12-well plates (Corning Life  
100 Sciences, NY, USA) at 10,000 cells/cm<sup>2</sup>, and the cell number was counted at 24-hour intervals  
101 until 96 hours. For cell counting, the medium was removed from the cell culture plates, washed  
102 twice with phosphate buffer saline (PBS), and then treated with 0.25% trypsin for 5 min at  
103 37 °C. The trypsin-treated cells were collected in a 15 ml tube, washed twice with the culture  
104 medium, and counted three times using the Adam-MC automatic cell counter (NanoEntek,

105 Korea). Viable cells were more accurately measured using an advanced image analysis  
106 program of Adam-MC cell counter.

107 Cell survival analysis was performed to investigate the effects of metformin (Sigma-  
108 Aldrich) and/or MPA (Sigma-Aldrich) on endometrial cancer cell lines. Cells were seeded into  
109 a 96 well plate (Ishikawa  $5 \times 10^4/\text{cm}^2$ , KLE  $2 \times 10^4/\text{cm}^2$  and USPC  $3 \times 10^4/\text{cm}^2$ ). The next day, cells  
110 were treated with 100  $\mu\text{M}$  and 1 mM of metformin, with or without 10  $\mu\text{M}$  of MPA. Then,  
111 survival rates of cells were analyzed after 24 hours and 48 hours of drug treatment using a 3-  
112 [4,5-dimethylthiazol-2-yl]-2,5 diphenyl tetrazolium bromide (MTT) assay kit (DoGen Co.,  
113 Korea). The assay was performed according to the supplier protocol  
114 ([http://www.dogenbio.com/shop/item.php?it\\_id=1490923054](http://www.dogenbio.com/shop/item.php?it_id=1490923054)).

115

## 116 **Western blot**

117 The proteins collected from each cell sample were quantitated, subjected to 12% SDS-  
118 PAGE, and then transferred to a nitrocellulose membrane. The membrane was subjected to  
119 blocking in PBS, containing 0.1% Tween20 (Sigma) and 5% skim milk (Invitrogen), probed  
120 with primary antibodies, progesterone receptor-B (C1A2), AMPK $\alpha$  (Thr172), phospho-  
121 AMPK $\alpha$  (Thr172) (Cell Signaling, MA, USA), and ErbB2 (Abcam, Cambridge, UK), and then  
122 reacted with peroxidase conjugated secondary antibody (Jackson Immuno Research, USA).  
123 Finally, target bands were visualized using SuperSignal chemiluminescent (ThermoFisher  
124 Scientific, MA, USA).

125

## 126 **Cell invasion assay and ELISA**

127 To perform invasion assays, we first coated matrigel (BD science, CA, USA) on a

128 transwell membrane with 8  $\mu\text{m}$  pores (Corning Life Sciences, NY, USA) at 37°C for 2 hours,  
129 and seeded  $8 \times 10^4$  cells/cm<sup>2</sup> into the transwell membrane. The next morning, the cells were  
130 starved for 2 hours in culture medium without FBS and the outside of the transwell was  
131 replaced with a 5% charcoal strip FBS (Life Technologies) containing medium to induce  
132 invasion for 24 hours in a 37°C, humidified atmosphere containing 5% CO<sub>2</sub>; anticancer drugs  
133 were treated according to the conditions at the time of the exchange of the medium. The next  
134 day, all the cells in the transwells were removed, and the transwells were inverted to stain the  
135 transferred cells with 0.2% crystal violet. The stained cells were de-stained with 2% SDS and  
136 absorbance was measured at 560 nm.

137 For quantitative analysis of cell migration related proteins, the secretion levels of  
138 Matrix metalloproteinase (MMP)-2 and -9 (R&D system, MN, USA) and transforming growth  
139 factor (TGF)- $\beta$ 1 (R&D system, MN, USA) were checked using ELISA kits. First, all cells were  
140 plated at  $9 \times 10^4$  cells/cm<sup>2</sup> into a 24 well plate (Corning Life Sciences, NY, USA) and starved  
141 for 2 hours in culture medium without FBS. The anticancer drugs were treated according to the  
142 conditions while the culture medium was exchanged with the complete medium. After 24 hours,  
143 the cultures were collected without cells and analyzed. An ELISA was performed according to  
144 the supplier protocol (<https://www.rndsystems.com/>).

145

## 146 **Statistical analysis**

147 All statistical analyses were performed using GraphPad PRISM (GraphPad Software  
148 Inc., CA, USA). The differences between the two groups were determined using a two-tailed  
149 unpaired Student's t-test. A p value <0.05 indicated statistical significance.

## 150 **Results**

151

### 152 **Cell growth and growth inhibition by tolerable doses of metformin** 153 **and MPA in endometrial cancer cell lines**

154 We found that USPC cells had the fastest growth rate among the three endometrial  
155 cancer cells during 96-hour incubation, followed by Ishikawa and KLE cells (Fig 1A and 1B).  
156 The MTT assay showed that treatment with metformin alone at  $\leq 1000 \mu\text{M}$  for 48 hours exerted  
157 significant inhibitory effects on the cell viability of Ishikawa, KLE, and USPC cells in a dose-  
158 dependent, but not in a time-dependent manner (Fig 1C-1E). In Ishikawa cells, a combination  
159 of metformin (0, 100, 1000  $\mu\text{M}$ ) and 10  $\mu\text{M}$  MPA induced a significant decrease in cell viability  
160 in a time- and dose-dependent manner (Fig 1C). Addition of 10  $\mu\text{M}$  MPA to metformin  
161 significantly inhibited cell viability compared to that by metformin alone at each dose (0, 100,  
162 1000  $\mu\text{M}$ ), respectively, in Ishikawa, but not in KLE and USPC cells.

163

164 **Fig 1. Cell growth and growth inhibition by metformin and medroxyprogesterone (MPA)**  
165 **in three endometrial cancer cell lines: Ishikawa, KLE, and USPC.** (A) Cell morphology  
166 and number at 24 hours and 72 hours, (B) cell growth rate (0, 24, 48, 72, and 96 hour), cell  
167 viability after treatment of different dose combinations of MPA (0, 10  $\mu\text{M}$ ) and metformin (0,  
168 100, 1000  $\mu\text{M}$ ) in Ishikawa (C), KLE (D), and USPC cells (E). \* $p < 0.05$ , \*\* $p < 0.005$ ,  
169 \*\*\* $p < 0.0005$ , \*\*\*\* $p < 0.00005$

170

171 **Changes in expression levels of PR and AMPK by a tolerable dose**



## 172 **of metformin and MPA in endometrial cancer cell lines**

173 A significant level of endogenous expression of PR-B was found in Ishikawa cells but  
174 not in KLE and USPC cells (Fig 2). In Ishikawa cells, metformin treatment alone induced the  
175 expression of PR-B in a dose-dependent manner, whereas metformin combined with 10  $\mu$ M  
176 MPA inhibited PR-B expression in a dose-dependent manner. Expression of AMPK $\alpha$  and its  
177 activated form, phospho-AMPK $\alpha$  (p-AMPK $\alpha$ ), were inhibited by metformin treatment alone  
178 in a dose-dependent manner (0, 100, 1000  $\mu$ M) in Ishikawa cells. However, p-AMPK $\alpha$  lost its  
179 dose-dependent pattern when Ishikawa cells were treated with a combination of metformin (0,  
180 100, 1000  $\mu$ M) and 10  $\mu$ M MPA. In KLE and USPC cells, there were no significant changes  
181 in expression patterns of ErbB2, AMPK $\alpha$ , and p-AMPK $\alpha$  when treated with any of the doses  
182 of metformin and MPA. In USPC cells, the expression of p-AMPK $\alpha$  was stronger when both  
183 metformin and MPA were used than when metformin was used alone. However, there was  
184 neither dose dependency in expression patterns nor consistency with anti-proliferative effects  
185 (Fig 1E).

186

187 **Fig 2. Expression of progesterone receptor B, ErbB2, AMPK $\alpha$ , and phospho-AMPK $\alpha$  in**  
188 **three endometrial cancer cell lines (Ishikawa, KLE, and USPC) according to treatment**  
189 **with different dose combinations of medroxyprogesterone (MPA) (0, 10  $\mu$ M) and**  
190 **metformin (0, 100, 1000  $\mu$ M).**

191

## 192 **Inhibition and disinhibition of cell invasion by a tolerable dose of** 193 **metformin with or without MPA in endometrial cancer cell lines**

194 There was no dose- or time-dependent cell growth inhibition or positive western blot

195 results for PR and p-AMPK $\alpha$  expression when any combination of metformin (0, 100, 1000  
196  $\mu$ M) and 10  $\mu$ M MPA were used in KLE and USPC cells. We further performed an invasion  
197 assay (Fig 3A), which showed that metformin treatment alone did not induce any significant  
198 changes in cell invasion in Ishikawa and USPC cells (Fig 3B and 3D). In KLE cells (Fig 3C),  
199 however, metformin treatment alone significantly inhibited cell invasion in a dose-dependent  
200 manner (1.31 $\pm$ 0.05, 0.94 $\pm$ 0.04, 0.83 $\pm$ 0.05 at 0, 100  $\mu$ M, 1 mM, respectively;  $p < 0.0005$ ).  
201 Treatment with MPA 10  $\mu$ M alone significantly decreased the invasion of KLE cells compared  
202 to that of control cells (1.31 $\pm$ 0.05 vs. 1.10 $\pm$ 0.05;  $p < 0.005$ ). Interestingly, the inhibitory effect  
203 of metformin alone on cell invasion was reversed to have a stimulating effect when metformin  
204 was combined with 10  $\mu$ M MPA (1.10 $\pm$ 0.05, 1.42 $\pm$ 0.18, 1.41 $\pm$ 0.26 at 0, 100, 1000  $\mu$ M,  
205 respectively;  $p < 0.005$ ) (Fig 3C). In Ishikawa cells, by contrast, a combination of 10  $\mu$ M MPA  
206 with metformin exerted a synergistic effect on the inhibition of cell invasion (0.93 $\pm$ 0.05,  
207 0.76 $\pm$ 0.01, 0.69 $\pm$ 0.01, at 0, 10  $\mu$ M MPA alone, 100  $\mu$ M metformin and 10  $\mu$ M MPA;  
208  $p < 0.0005$ ), although the synergistic effect disappeared at a metformin dose of 1000  $\mu$ M  
209 (0.84 $\pm$ 0.08) (Fig 3B). There was no significant effect of metformin and MPA combination on  
210 the invasion of USPC cells (Fig 3D).

211

212 **Fig 3. Invasion assay in three endometrial cancer cell lines (Ishikawa, KLE, and USPC).**

213 (A) The process of invasion assay, cell invasion after treatment of different dose combinations  
214 of medroxyprogesterone (MPA) (0, 10  $\mu$ M) and metformin (0, 100, 1000  $\mu$ M) in Ishikawa (B),  
215 KLE (C), and USPC cells (D). \* $p < 0.05$ , \*\* $p < 0.005$ , \*\*\* $p < 0.0005$

216

217 **MPA reverses tolerable dose metformin-induced inhibition of**

218 **invasion via MMP-9 and TGF- $\beta$ 1 in KLE endometrial cancer cells**

219 MMP-2 showed no significant changes in response to the treatments in all three cell  
220 lines (Fig 4A-4C). However, although decreased MMP-9 induced by metformin treatment  
221 alone was not statistically significant, MMP-9 showed the same trends of rise with cell invasion  
222 in KLE cells when treated in combination with metformin (0, 100, 1000  $\mu$ M) and 10  $\mu$ M MPA  
223 (3.99 $\pm$ 0.90 for control, 5.83 $\pm$ 1.04, 7.68 $\pm$ 1.38, 8.05 $\pm$ 2.09 ng/ml, respectively;  $p$ <0.05) (Fig 4E).  
224 Otherwise, there were no significant changes in MMP-9 expression in Ishikawa and USPC  
225 cells (Fig 4D and 4F).

226

227 **Fig 4. Matrix metalloproteinase (MMP)-2 (A, Ishikawa; B, KLE; C, USPC) and MMP-9**  
228 **(D, Ishikawa; E, KLE, F, USPC) in three endometrial cancer cell lines after treatment**  
229 **with different dose combinations of medroxyprogesterone (MPA) (0, 10  $\mu$ M) and**  
230 **metformin (0, 100, 1000  $\mu$ M) \* $p$ < 0.05.**

231

232 TGF- $\beta$ 1 also showed similar trends to MMP-9, which was in concordance with the  
233 change in cell invasion (Fig 5B). TGF- $\beta$ 1 secretion was significantly decreased when KLE  
234 cells were treated with 1000  $\mu$ M metformin alone compared to that in control cells (62.76 $\pm$ 2.18  
235 vs. 54.19 $\pm$ 3.60 pg/mL;  $p$ =0.024). Furthermore, TGF- $\beta$ 1 also exhibited the reverse pattern when  
236 treated with a combination of 1000  $\mu$ M metformin and 10  $\mu$ M MPA (62.76 $\pm$ 2.18 vs.  
237 77.52 $\pm$ 5.95;  $p$ =0.016). There were no significant changes in TGF- $\beta$ 1 levels according to the  
238 treatments in Ishikawa and USPC cells (Fig 5A and 5C).

239

240 **Fig 5. Transforming growth factor (TGF)- $\beta$ 1 in three endometrial cancer cell lines after**

241 **treatment with different dose combinations of medroxyprogesterone (MPA) (0, 10  $\mu$ M)**  
242 **and metformin (0, 1000  $\mu$ M) in Ishikawa (A), KLE (B), and USPC cells (C). \*p< 0.05,**  
243 **\*\*p<0.005**

244

## 245 **Discussion**

246

247 The principal finding of our study was that tolerable doses of metformin alone  $\leq$  1000  
248  $\mu$ M have anti-invasive effects on KLE cells, and the anti-invasive effect of metformin is even  
249 reversed by the addition of 10  $\mu$ M MPA. Changes in the expression of MMP-9 and TGF- $\beta$ 1  
250 were plausible mechanisms underlying these findings. We also showed that tolerable doses of  
251 metformin alone,  $\leq$  1000,  $\mu$ M inhibited cell proliferation of Ishikawa, KLE, and USPC cells in  
252 a dose-dependent manner. However, there was no additive or synergistic anti-proliferative  
253 effect of metformin  $\leq$  1000  $\mu$ M and MPA co-treatment in KLE and USPC cells.

254 MPA is recommended as a fertility-preserving treatment for young endometrial cancer  
255 patients, as well as palliative treatment for terminally ill patients with hormone receptor-  
256 positive cancer, especially with PR; most of the MPA anticancer effects are known to act  
257 through the interaction with PR (15). However, response rates of MPA are unsatisfying because  
258 of the appearance of progesterone resistance; efforts were made to find an effective way to  
259 overcome this (12, 15, 16). Metformin was suggested to combine with MPA, based on several  
260 mechanisms of reversing progesterone resistance, mainly as a potent inhibitor of the PI3K-  
261 AKT-mTOR pathway by activating AMPK. However, there were two issues to be solved. One  
262 is the supra-therapeutic concentration of metformin. The activation of AMPK was almost  
263 always demonstrated at an unrealistically high supra-therapeutic concentration of metformin,

264 considering the maximal dose in humans (without the risk of serious side effects) (16, 17). The  
265 other is that most of the findings were true only in Ishikawa cells, but not in other types of cells,  
266 for example, KLE (12). Therefore, we tried to find any anti-cancer effects of tolerable doses of  
267 metformin with or without MPA in endometrial cancer cells with non-favorable clinical  
268 behavior.

269 We found that metformin alone at  $\leq 1000 \mu\text{M}$  significantly inhibited the proliferation  
270 of all three cell lines (Fig 1C-1E and 2). The anti-proliferative effect of metformin alone at  $\leq$   
271  $1000 \mu\text{M}$  in PR-positive Ishikawa cells might be mediated through PR-B. This is because the  
272 expression of PR-B but not of p-AMPK- $\alpha$  increased in a dose-dependent manner with  
273 metformin treatment (Fig 2). On the other hand, growth inhibition by low-dose metformin  
274 alone of KLE and USPC cells and the synergistic anti-proliferative effect of metformin in  
275 combination with MPA in Ishikawa cells were neither associated with PR-B nor with the  
276 AMPK-dependent pathway because there were no corresponding changes in their expression  
277 levels (Fig 2). The plausible mechanism underlying this synergistic anti-proliferative effect of  
278 the metformin and MPA combination on Ishikawa cells could include AMPK-independent  
279 pathways, including factors of the Rag family of GTPases, hypoxia inducible factor (HIF)  
280 target gene, and regulated in development and the DNA damage response I (REDD1) (17).  
281 Other studies confirmed that there was no significant increase in p-AMPK $\alpha$  expression at low  
282 doses of metformin,  $\leq 1000 \mu\text{M}$ , in Ishikawa, KLE, and USPC cells (18, 19). In these studies,  
283 high dose metformin  $\geq 10 \text{ mM}$  was shown to be necessary to bring about a significant increase  
284 in p-AMPK $\alpha$  expression. As there were no significant changes in PR and p-AMPK $\alpha$  levels in  
285 KLE and USPC cells when metformin was combined with MPA (Fig 2), we moved our focus  
286 towards invasion; the plausible invasion mechanism was not related to the activation of AMPK.

287 It was interesting that the dose-dependent inhibitory effect of metformin  $\leq 1000 \mu\text{M}$

288 on cell invasion was found only in KLE cells, but not in Ishikawa and USPC cells. It was even  
289 more interesting that the addition of MPA to metformin resulted in the opposite effects on cell  
290 invasion in the two different types of cells, i.e. stimulating (reversing metformin effect) in KLE  
291 and inhibitory (possible synergistic effect) in Ishikawa cells (Fig 3B and 3C). The finding of  
292 low dose metformin alone not conferring any change in invasion capability of Ishikawa cells  
293 was consistent with that in a study of de Barros Machado et al. (20). Even though we could not  
294 find a plausible molecular mechanism for the synergistic anti-invasive effect of the narrow  
295 dose window of metformin (0-100  $\mu$ M) and MPA combination in Ishikawa cells (Fig 3B), it is  
296 notable that MMP-9 and TGF- $\beta$ 1 showed the same pattern of change to that of cell invasion  
297 only in KLE cells (Fig 4 and 5). MMP is known as one of the most essential proteases in the  
298 proteolysis of extracellular matrix proteins and plays important roles in invasion and migration  
299 (21). Unlike other relevant studies of MMPs in which the results were the same in MMP-2 and  
300 MMP-9 (21-23), the results of our study were specific to MMP-9, but not MMP-2. TGF- $\beta$  has  
301 also been extensively studied as a crucial cytokine which promotes endometrial cancer invasion  
302 and metastasis via epithelial mesenchymal transition (21, 23, 24). MMPs and TGF- $\beta$  form an  
303 interplay loop in which one might activate the other and vice versa, to facilitate tumor  
304 progression. The results of our study suggest that this loop could be inhibited by metformin at  
305 doses as low as less than 1000  $\mu$ M, but completely disinhibited or even stimulated by co-  
306 treatment of MPA and metformin in KLE cells. Samarntai et al. (25) reported the dualistic  
307 model of endometrial carcinoma, type I and type II, in terms of genetic changes and clinical  
308 behavior. KLE cells could be clinically characterized as type II cancer cells because of the  
309 aggressive behavior and poor outcomes, but also as type I due to the frequent PTEN and KRAS  
310 mutations and rare p53 mutation, which are typical in type I cancer.

311 Despite a small number of studies, so far, addressing the anti-invasive and/or anti-

312 migratory effects of metformin in endometrial cancer cells, this study is, to the best of our  
313 knowledge, the first study which showed that the significant anti-invasive effect of a tolerable  
314 dose of metformin in KLE cells was completely reversed to the state of no treatment by the  
315 addition of MPA; these findings might be mediated through MMP-9 and TGF- $\beta$ 1. However,  
316 our study has some limitations in that metformin was not shown as an AMPK activator.  
317 However, there are a few studies which did not support metformin as a potent AMPK activator,  
318 not only in proliferation (18), but also in invasion (22). Some values were out of the expected  
319 ranges, for example, MMP-9 concentration after treatment with 1000  $\mu$ M metformin only,  
320 which was expected to be lower than that of 100  $\mu$ M metformin. Lastly, treatment with  
321 inhibitors such as GM6001 (an MMP inhibitor) could have made our results more confirmative.

322 Most studies on metformin and MPA in endometrial cancer have concluded that  
323 combining the two could be a potential therapeutic strategy for overcoming progesterone  
324 resistance (12, 15). However, our study suggests the possibility of the combination being  
325 harmful instead of beneficial in some conditions, especially in clinically highly aggressive but  
326 genetically type I cancer. Further animal studies are required to clinically confirm our study  
327 findings.

328

## 329 **Disclosure of conflict of interest**

330 No potential conflict of interest relevant to this article was reported.

331

332

## 333 **References**

334

335 1. Siegel RL, Miller KD, Jemal A. Cancer statistics, 2018. *CA Cancer J Clin.*  
336 2018;68(1):7-30.

337 2. Singh M, Zaino RJ, Filiaci VJ, Leslie KK. Relationship of estrogen and progesterone  
338 receptors to clinical outcome in metastatic endometrial carcinoma: a Gynecologic Oncology  
339 Group Study. *Gynecol Oncol.* 2007;106(2):325-33.

340 3. Ushijima K, Yahata H, Yoshikawa H, Konishi I, Yasugi T, Saito T, et al. Multicenter  
341 phase II study of fertility-sparing treatment with medroxyprogesterone acetate for endometrial  
342 carcinoma and atypical hyperplasia in young women. *J Clin Oncol.* 2007;25(19):2798-803.

343 4. Kobayashi Y, Banno K, Kunitomi H, Tominaga E, Aoki D. Current state and outlook  
344 for drug repositioning anticipated in the field of ovarian cancer. *J Gynecol Oncol.*  
345 2019;30(1):e10.

346 5. Perez-Lopez FR, Pasupuleti V, Gianuzzi X, Palma-Ardiles G, Hernandez-Fernandez  
347 W, Hernandez AV. Systematic review and meta-analysis of the effect of metformin treatment  
348 on overall mortality rates in women with endometrial cancer and type 2 diabetes mellitus.  
349 *Maturitas.* 2017;101:6-11.

350 6. Laskov I, Drudi L, Beauchamp MC, Yasmeen A, Ferenczy A, Pollak M, et al. Anti-  
351 diabetic doses of metformin decrease proliferation markers in tumors of patients with  
352 endometrial cancer. *Gynecol Oncol.* 2014;134(3):607-14.

353 7. Nevadunsky NS, Van Arsdale A, Strickler HD, Moadel A, Kaur G, Frimer M, et al.  
354 Metformin use and endometrial cancer survival. *Gynecol Oncol.* 2014;132(1):236-40.

355 8. He L, Wondisford FE. Metformin action: concentrations matter. *Cell Metab.*



356 2015;21(2):159-62.

357 9. Kajbaf F, De Broe ME, Lalau JD. Therapeutic Concentrations of Metformin: A  
358 Systematic Review. *Clin Pharmacokinet*. 2016;55(4):439-59.

359 10. Guy MS, Qamar L, Behbakht K, Post MD, Sheeder J, Sartorius CA, et al. Progesterin  
360 treatment decreases CD133+ cancer stem cell populations in endometrial cancer. *Gynecol  
361 Oncol*. 2016;140(3):518-26.

362 11. Bokhari AA, Lee LR, Raboteau D, Hamilton CA, Maxwell GL, Rodriguez GC, et al.  
363 Progesterone inhibits endometrial cancer invasiveness by inhibiting the TGFbeta pathway.  
364 *Cancer Prev Res (Phila)*. 2014;7(10):1045-55.

365 12. Zhang Z, Dong L, Sui L, Yang Y, Liu X, Yu Y, et al. Metformin reverses progesterin  
366 resistance in endometrial cancer cells by downregulating GloI expression. *Int J Gynecol Cancer*.  
367 2011;21(2):213-21.

368 13. Zhou X, Wang Z, Zhao Y, Podratz K, Jiang S. Characterization of sixteen endometrial  
369 cancer cell lines. *Cancer Research*. 2007;67(9 supplement\_abstract 3870).

370 14. Hong Y, Rohatagi S, Habtemariam B, Walker JR, Schwartz SL, Mager DE. Population  
371 exposure-response modeling of metformin in patients with type 2 diabetes mellitus. *J Clin  
372 Pharmacol*. 2008;48(6):696-707.

373 15. Xie Y, Wang YL, Yu L, Hu Q, Ji L, Zhang Y, et al. Metformin promotes progesterone  
374 receptor expression via inhibition of mammalian target of rapamycin (mTOR) in endometrial  
375 cancer cells. *J Steroid Biochem Mol Biol*. 2011;126(3-5):113-20.

376 16. Zhuo Z, Wang A, Yu H. Metformin targeting autophagy overcomes progesterone  
377 resistance in endometrial carcinoma. *Arch Gynecol Obstet*. 2016;294(5):1055-61.

378 17. Sivalingam VN, Myers J, Nicholas S, Balen AH, Crosbie EJ. Metformin in  
379 reproductive health, pregnancy and gynaecological cancer: established and emerging

- 380 indications. *Hum Reprod Update*. 2014;20(6):853-68.
- 381 18. Liu Z, Qi S, Zhao X, Li M, Ding S, Lu J, et al. Metformin inhibits 17beta-estradiol-  
382 induced epithelial-to-mesenchymal transition via betaKlotho-related ERK1/2 signaling and  
383 AMPKalpha signaling in endometrial adenocarcinoma cells. *Oncotarget*. 2016;7(16):21315-31.
- 384 19. Sarfstein R, Friedman Y, Attias-Geva Z, Fishman A, Bruchim I, Werner H. Metformin  
385 downregulates the insulin/IGF-I signaling pathway and inhibits different uterine serous  
386 carcinoma (USC) cells proliferation and migration in p53-dependent or -independent manners.  
387 *PLoS One*. 2013;8(4):e61537.
- 388 20. de Barros Machado A, Dos Reis V, Weber S, Jauckus J, Brum IS, von Eye Corleta H,  
389 et al. Proliferation and metastatic potential of endometrial cancer cells in response to metformin  
390 treatment in a high versus normal glucose environment. *Oncol Lett*. 2016;12(5):3626-32.
- 391 21. Chang CC, Ling XH, Hsu HF, Wu JM, Wang CP, Yang JF, et al. Siegesbeckia  
392 orientalis Extract Inhibits TGFbeta1-Induced Migration and Invasion of Endometrial Cancer  
393 Cells. *Molecules*. 2016;21(8).
- 394 22. Tan BK, Adya R, Chen J, Lehnert H, Sant Cassia LJ, Randeve HS. Metformin  
395 treatment exerts antiinvasive and antimetastatic effects in human endometrial carcinoma cells.  
396 *J Clin Endocrinol Metab*. 2011;96(3):808-16.
- 397 23. Bokhari AA, Baker TM, Dorjbal B, Waheed S, Zahn CM, Hamilton CA, et al. Nestin  
398 suppression attenuates invasive potential of endometrial cancer cells by downregulating TGF-  
399 beta signaling pathway. *Oncotarget*. 2016;7(43):69733-48.
- 400 24. Muinelo-Romay L, Colas E, Barbazan J, Alonso-Alconada L, Alonso-Nocelo M,  
401 Bouso M, et al. High-risk endometrial carcinoma profiling identifies TGF-beta1 as a key factor  
402 in the initiation of tumor invasion. *Mol Cancer Ther*. 2011;10(8):1357-66.
- 403 25. Samarathai N, Hall K, Yeh IT. Molecular profiling of endometrial malignancies.

404 Obstet Gynecol Int. 2010;2010:162363.

405

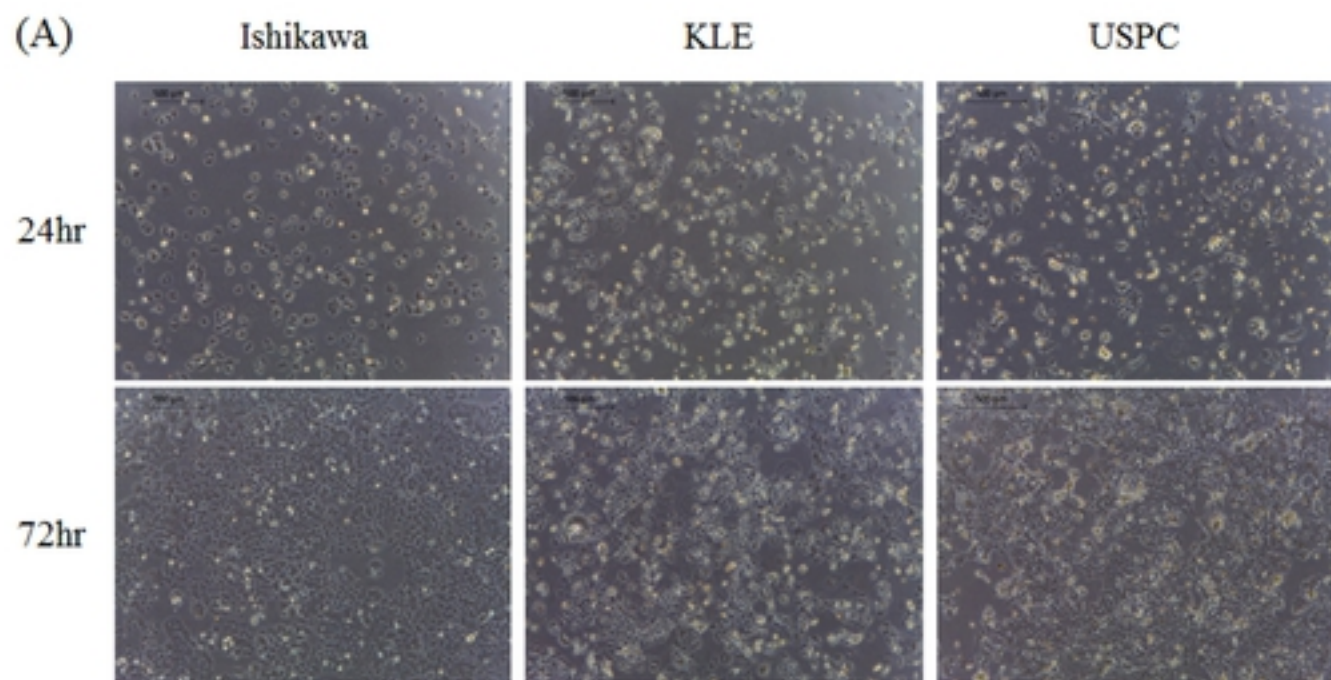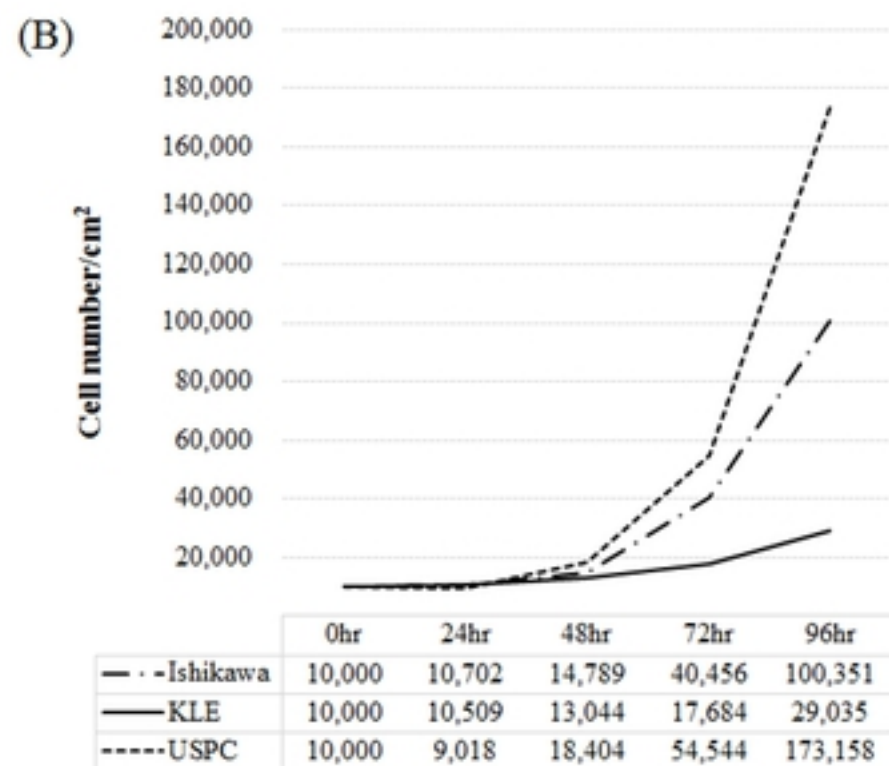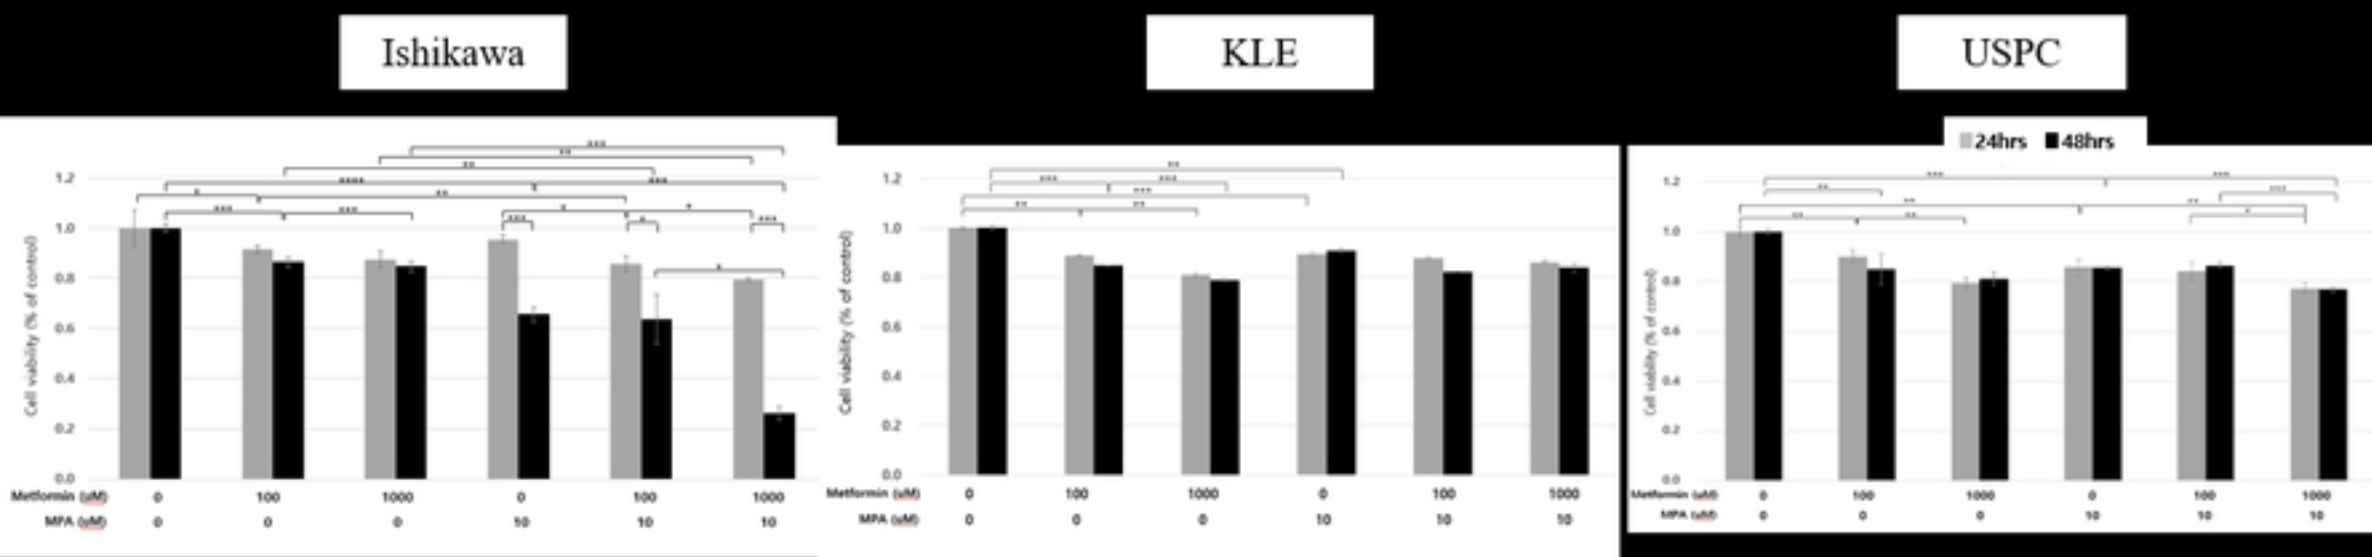

figure1

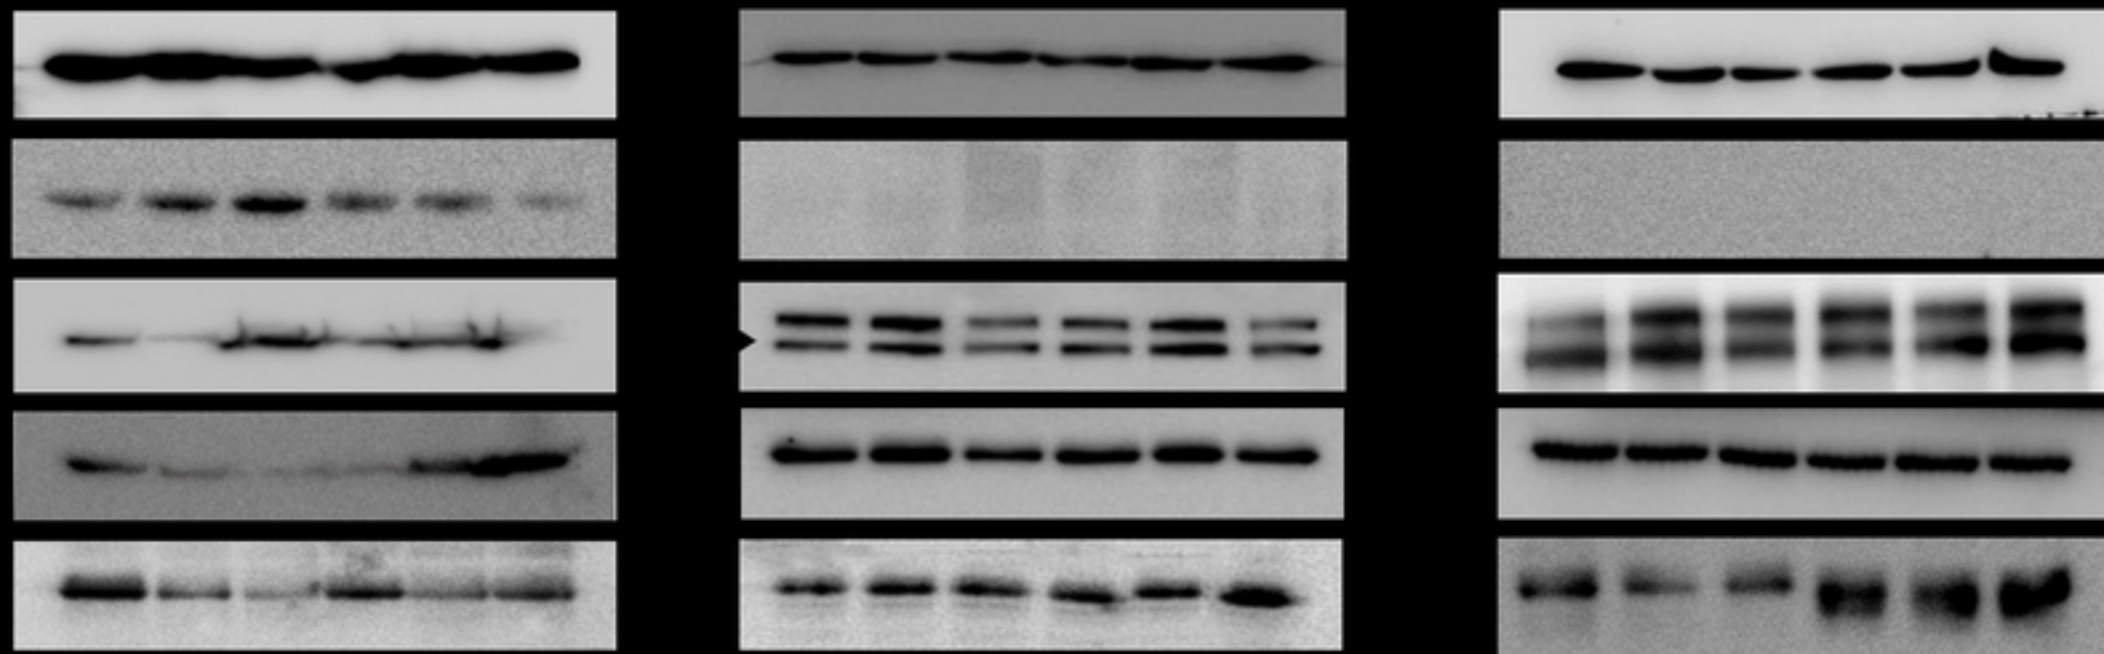

Figure2

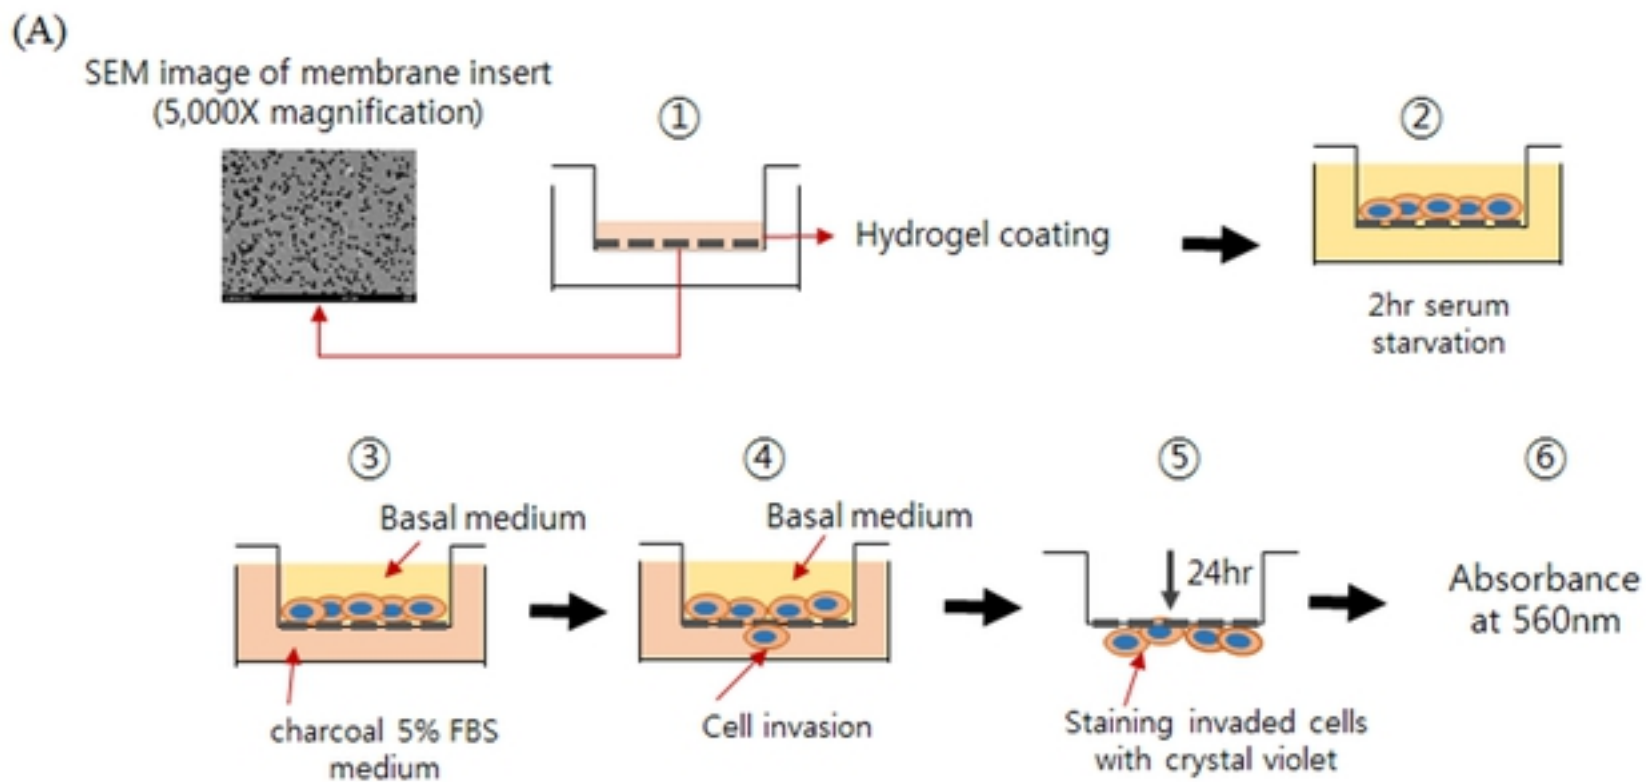

Ishikawa

KLE

USPC

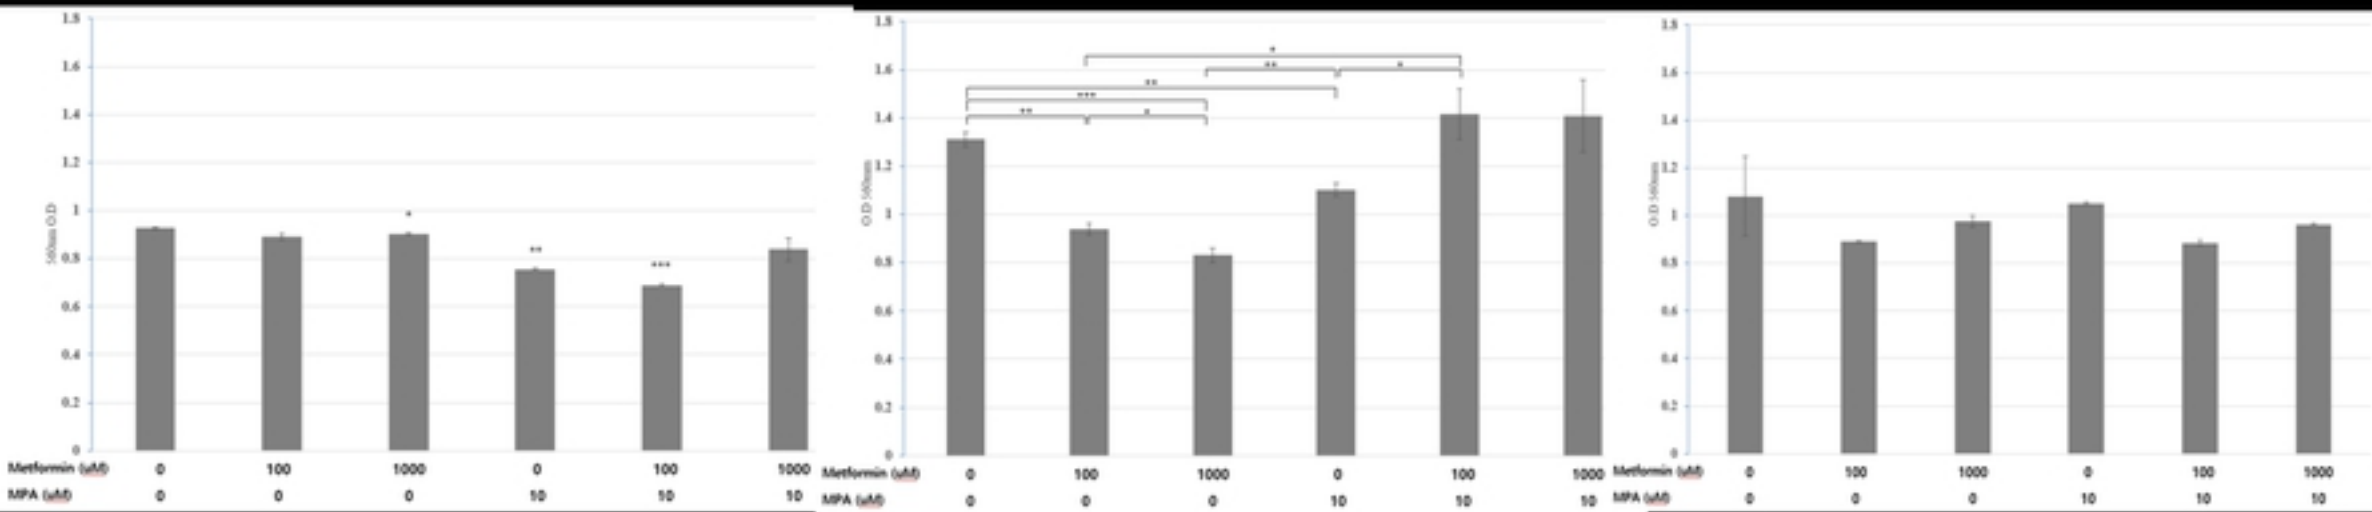

Figure 3

Ishikawa

KLE

USPC

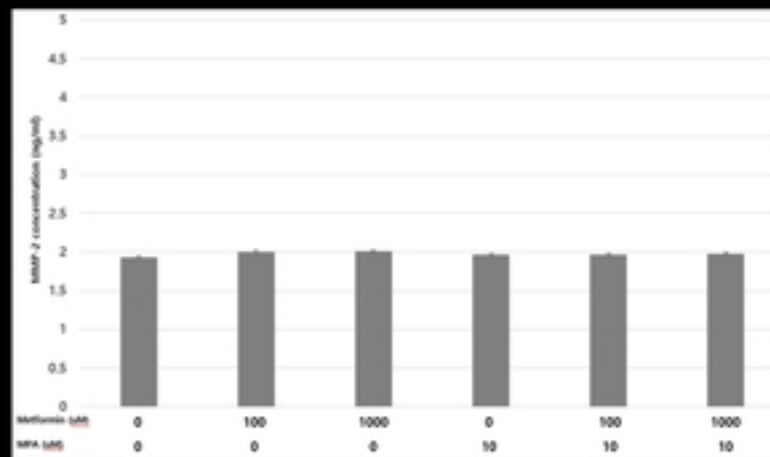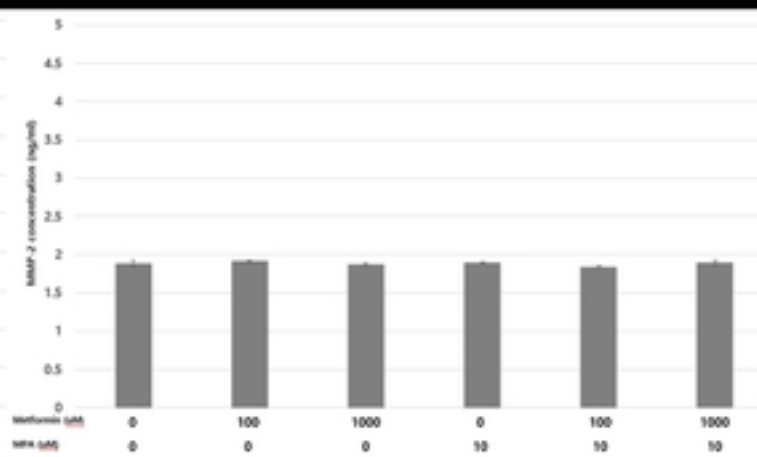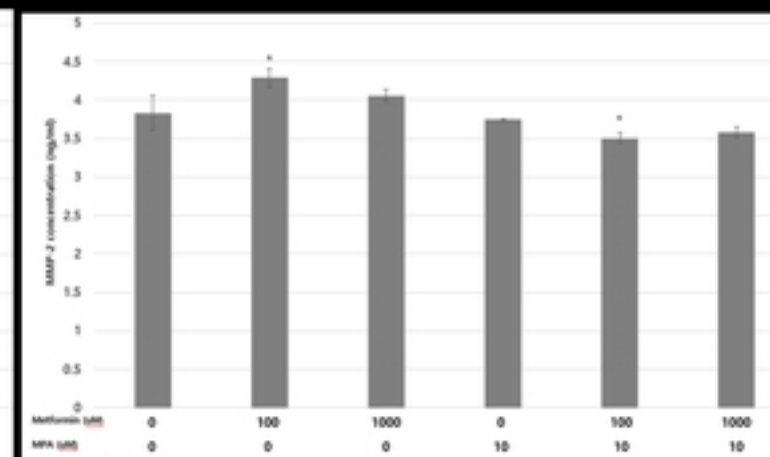

Ishikawa

KLE

USPC

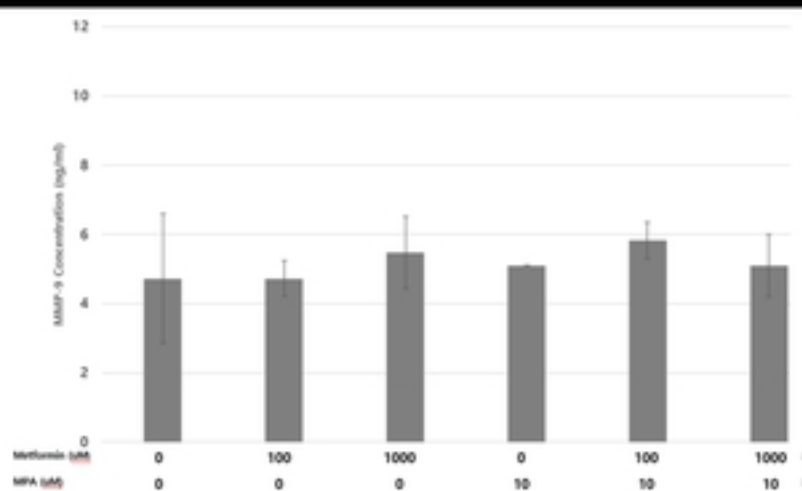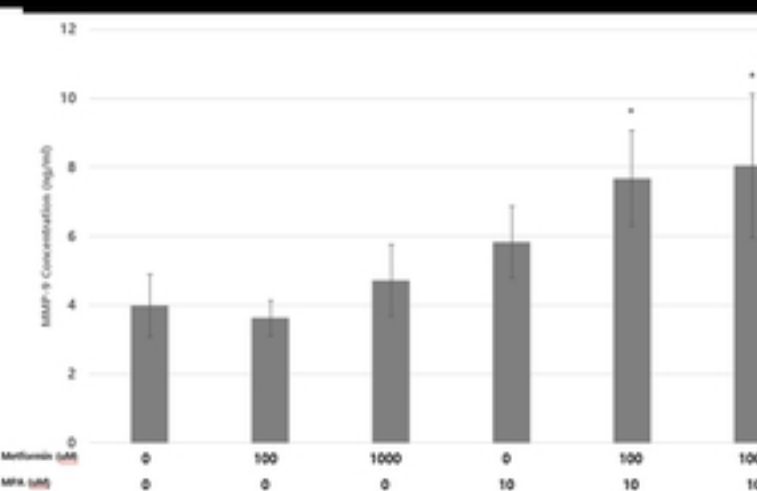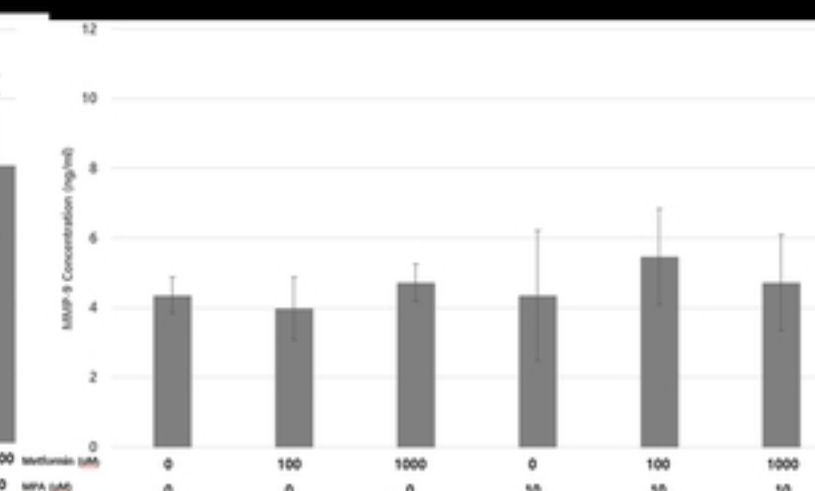

Figure4

Ishikawa

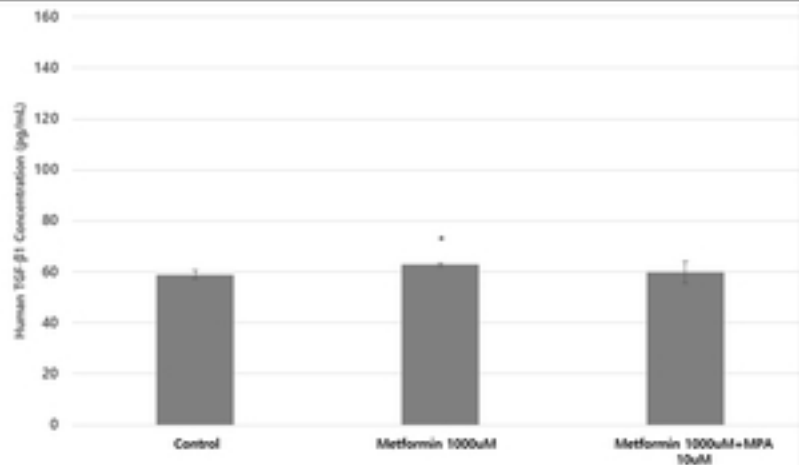

KLE

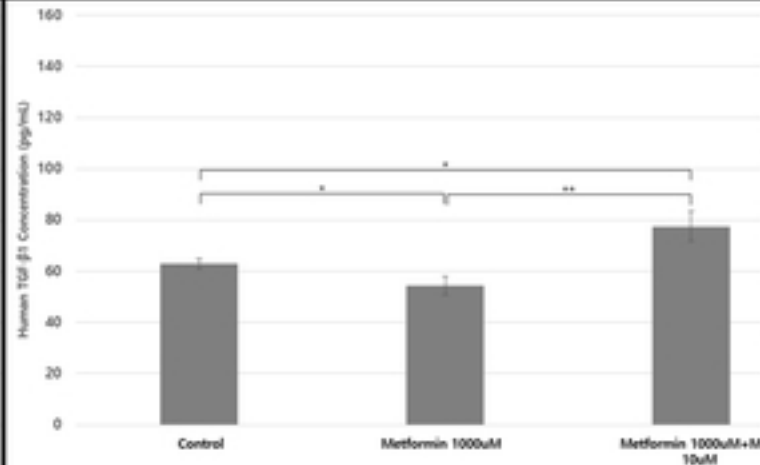

USPC

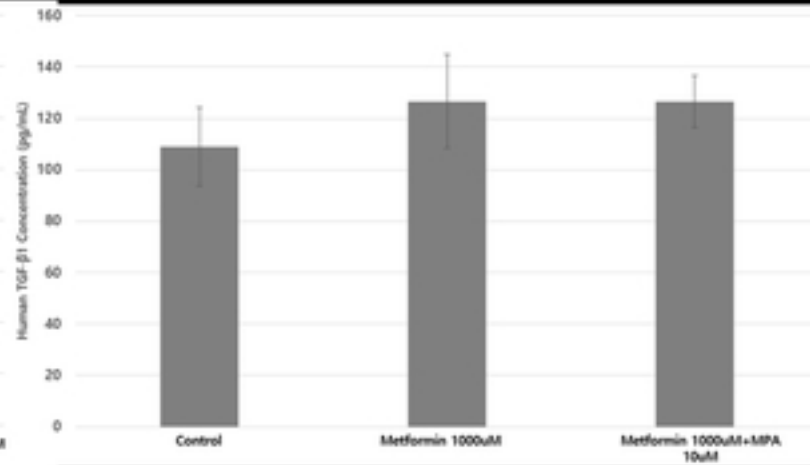

Figure5
